# Supplementary material for: Potentiality of Actinomycetia Prevalent in Selected Forest Ecosystems in Assam, India to Combat Multi-Drug-Resistant Microbial Pathogens
Source: MDPI journal article supplement (doi:10.3390/metabo13080911), 2023-08-03
Supplement: s1 [file s1]

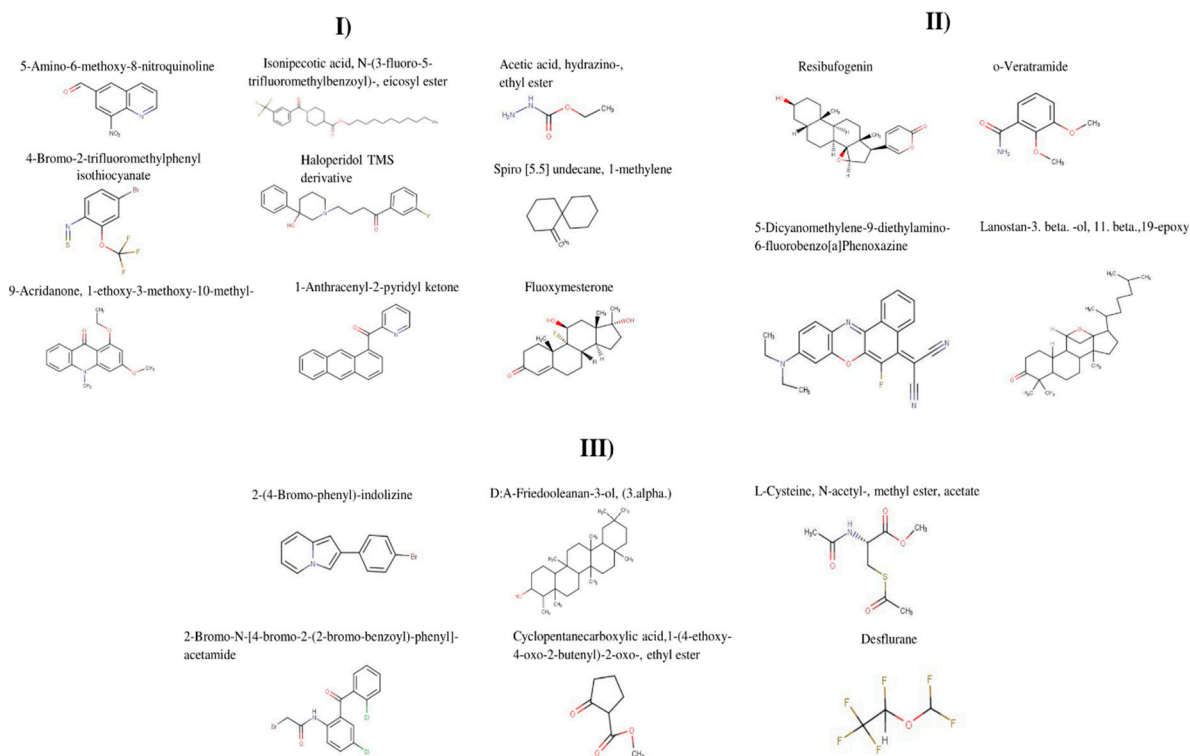

**Figure S1. GC-MS analysis of the ethyl acetate extracts of actinomycetia strains.** Chemical structures of the identified compounds (I) *Streptomyces* sp. PBR1; (II) *Streptomyces* sp. PBR36; (III) *Streptomyces* sp. DBR11.
