# Supplementary material for: Potentiality of Actinomycetia Prevalent in Selected Forest Ecosystems in Assam, India to Combat Multi-Drug-Resistant Microbial Pathogens
Source: MDPI journal article supplement (doi:10.3390/metabo13080911), 2023-08-03
Supplement: s1 [file s1]

**Table S1. *In vitro* sensitivity profile of MDR pathogens against standard antibiotics.**

| Sample ID | Colony Color | Causative pathogen (Preliminary screening) | Ampicillin (AMP) 10 µg | Cefazolin (CZ) 30 µg | Nalidixic acid (NA) 30 µg | Norfloxacin (NX) 10 µg | Ciprofloxacin (CIP) 5 µg | Co-trimoxazole (COT) 25 µg | Levofloxacin (LE) 5 µg | Nitrofurantoin (NIT) 300 µg |
|-----------|--------------|--------------------------------------------|------------------------|----------------------|---------------------------|------------------------|--------------------------|----------------------------|------------------------|-----------------------------|
| GNR1      | Pink         | <i>E. coli</i>                             | R                      | R                    | R                         | I                      | R                        | R                          | I                      | 15                          |
| GNR2      | Blue         | <i>E. faecalis</i>                         | R                      | R                    | R                         | 25                     | I                        | R                          | 30                     | R                           |
| GNR3      | Purple       | <i>K. pneumoniae</i>                       | R                      | R                    | R                         | R                      | R                        | R                          | R                      | 18                          |
| GNR4      | Blue         | <i>E. faecalis</i>                         | R                      | 17                   | R                         | I                      | R                        | 20                         | R                      | 10                          |
| GNR5      | Blue         | <i>E. faecalis</i>                         | 20                     | 17                   | R                         | R                      | R                        | R                          | R                      | 17                          |
| GNR6      | White        | <i>C. albicans</i>                         | 20                     | 26                   | R                         | 17                     | 25                       | 22                         | 15                     | R                           |
| GNR7      | Blue         | <i>E. faecalis</i>                         | R                      | R                    | R                         | I                      | R                        | R                          | R                      | I                           |
| GNR8      | Pink         | <i>E. coli</i>                             | R                      | R                    | R                         | I                      | R                        | R                          | I                      | R                           |
| GNR9      | Pink         | <i>E. coli</i>                             | R                      | R                    | R                         | R                      | R                        | R                          | R                      | R                           |
| GNR10     | White        | <i>C. albicans</i>                         | I                      | 25                   | 18                        | 18                     | 18                       | 18                         | 20                     | 13                          |
| GNR11     | Blue         | <i>E. faecalis</i>                         | R                      | R                    | R                         | I                      | R                        | 35                         | R                      | R                           |
| GNR12     | Pink         | <i>E. coli</i>                             | R                      | R                    | R                         | I                      | R                        | R                          | R                      | R                           |
| GNR13     | Pink         | <i>E. coli</i>                             | R                      | R                    | R                         | I                      | R                        | 25                         | R                      | 18                          |
| GNR14     | Purple       | <i>K. pneumonia</i>                        | 14                     | 23                   | R                         | R                      | R                        | R                          | R                      | 28                          |
| GNR15     | Pink         | <i>E. coli</i>                             | R                      | R                    | R                         | 22                     | R                        | R                          | R                      | R                           |
| GNR16     | Pink         | <i>E. coli</i>                             | R                      | R                    | R                         | 21                     | R                        | R                          | I                      | R                           |
| GNR17     | Blue         | <i>E. faecalis</i>                         | R                      | 21                   | 19                        | 23                     | I                        | 22                         | 29                     | R                           |
| GNR18     | Yellow       | <i>P. aeruginosa</i>                       | R                      | 26                   | R                         | R                      | R                        | R                          | R                      | I                           |
| GNR19     | Pink         | <i>E. coli</i>                             | R                      | R                    | R                         | R                      | R                        | R                          | R                      | R                           |

Antimicrobial susceptibility test as per CLSI criteria; 2020. Inhibition zone in mm. (**R**-Resistant, **I**- Intermediate)

**Table S2. Morphological characteristics of 65 actinomycetia isolates with their respective media and place of isolation.**

| Sl. No | Isolate code | Isolation site | Isolation media | Color of aerial mycelium | Color of substrate mycelium | Diffusible pigment | Colony morphology [Form, margin, elevation] |
|--------|--------------|----------------|-----------------|--------------------------|-----------------------------|--------------------|---------------------------------------------|
| 1.     | PBR1         | PWS            | AIA             | Pale yellow              | Light brown                 | NP                 | Irregular, undulate, raised                 |
| 2.     | PBR2         | PWS            | SA              | Brown                    | Light brown                 | NP                 | Irregular, lobate, raised                   |
| 3.     | PBR3         | PWS            | AIA             | Pale yellowish           | Light yellow                | NP                 | Irregular, undulate, flat                   |
| 4.     | PBR4         | PWS            | SA              | Creamy brown             | Light brown                 | NP                 | Irregular, undulate, umbonate               |
| 5.     | PBR5         | PWS            | SA              | Brown                    | Brown                       | NP                 | Circular, undulate, convex                  |
| 6.     | PBR6         | PWS            | SA              | Creamy white             | Creamy white                | NP                 | Irregular, curled, pulvinate                |
| 7.     | PBR7         | PWS            | SA              | Light brown              | Pale yellow                 | NP                 | Circular, undulate, flat                    |
| 8.     | PBR8         | PWS            | SA              | White                    | Pale yellow                 | Yellowish          | Circular, lobate, umbonate                  |
| 9.     | PBR9         | PWS            | SA              | Creamy white             | Light brown                 | NP                 | Irregular, undulate, flat                   |
| 10.    | PBR10        | PWS            | SA              | Creamy white             | Creamy white                | NP                 | Circular, lobate, umbonate                  |
| 11.    | PBR11        | PWS            | AIA             | White                    | Pale yellow                 | NP                 | Irregular, flat, undulate                   |
| 12.    | PBR12        | PWS            | AIA             | Creamy white             | Creamy white                | NP                 | Irregular, undulate, raised                 |
| 13.    | PBR13        | PWS            | SA              | Pinkish white            | Pale yellow                 | Yellowish          | Circular, undulate, umbonate                |
| 14.    | PBR14        | PWS            | SA              | Creamy white             | white                       | NP                 | Irregular, lobate, umbonate                 |
| 15.    | PBR15        | PWS            | SA              | Creamy white             | Creamy white                | NP                 | Irregular, curled, convex                   |
| 16.    | PBR16        | PWS            | SA              | Pale yellow              | Yellowish                   | Yellowish          | Circular, undulate, umbonate                |
| 17.    | PBR17        | PWS            | SA              | Pink                     | Pink                        | Brownish           | Circular, undulate, raised                  |
| 18.    | PBR18        | PWS            | SA              | Light brown              | Light brown                 | NP                 | Circular, undulate, umbonate                |
| 19.    | PBR19        | PWS            | SA              | Grey white               | Whitish                     | NP                 | Circular, undulate, raised                  |
| 20.    | PBR20        | PWS            | AIA             | Creamy brown             | Light brown                 | NP                 | Circular, undulate, raised                  |
| 21.    | PBR21        | PWS            | AIA             | Creamy white             | Creamy white                | NP                 | Circular, entire, convex                    |
| 22.    | PBR22        | PWS            | SA              | White                    | Pale yellow                 | NP                 | Irregular, undulate, raised                 |
| 23.    | PBR23        | PWS            | SA              | White                    | Creamy white                | Brownish           | Circular, undulate, raised                  |
| 24.    | PBR24        | PWS            | SA              | Creamy white             | Pale yellow                 | Pale yellow        | Circular, undulate, flat                    |
| 25.    | PBR25        | PWS            | AIA             | Light pink               | Pink                        | NP                 | Circular, entire, convex                    |
| 26.    | PBR26        | PWS            | AIA             | Pink                     | Pink                        | NP                 | Circular, undulate, raised                  |
| 27.    | PBR27        | PWS            | SA              | Light brown              | Brownish                    | NP                 | Circular, entire, umbonate                  |
| 28.    | PBR28        | PWS            | SA              | Creamy brown             | Creamy brown                | NP                 | Irregular, undulate, umbonate               |
| 29.    | PBR29        | PWS            | SA              | Light brown              | Brownish                    | NP                 | Circular, undulate, umbonate                |
| 30.    | PBR30        | PWS            | SA              | Creamy white             | Creamy white                | NP                 | Circular, entire, pulvinate                 |
| 31.    | PBR31        | PWS            | AIA             | White                    | Pale yellow                 | NP                 | Circular, entire, convex                    |
| 32.    | PBR32        | PWS            | SA              | Creamy white             | Light brown                 | NP                 | Circular, entire, umbonate                  |
| 33.    | PBR33        | PWS            | SA              | White                    | Dark brown                  | Brownish           | Circular, entire, umbonate                  |
| 34.    | PBR34        | PWS            | SA              | Dark brown               | Dark brown                  | Brownish           | Irregular, undulate, umbonate               |
| 35.    | PBR35        | PWS            | AIA             | Light yellow             | yellow                      | Yellowish          | Circular, undulate, crateriform             |
| 36.    | PBR36        | PWS            | AIA             | White                    | Light brown                 | Brownish           | Circular, undulate, umbonate                |
| 37.    | PBR37        | PWS            | SA              | Yellow                   | Pale yellow                 | NP                 | Circular, undulate, umbonate                |
| 38.    | PBR38        | PWS            | SA              | Creamy white             | Pale yellow                 | NP                 | Circular, undulate, umbonate                |
| 39.    | PBR39        | PWS            | AIA             | Black                    | Black                       | NP                 | Circular, undulate, raised                  |
| 40.    | DBR1         | DBWS           | AIA             | Pale yellow              | Light brown                 | NP                 | Irregular, undulate, raised                 |
| 41.    | DBR2         | DBWS           | AIA             | Dark brown               | Dark brown                  | Brownish           | Circular, undulate, umbonate                |
| 42.    | DBR3         | DBWS           | SA              | Greyish white            | Dark brown                  | NP                 | Circular, undulate, raised                  |
| 43.    | DBR4         | DBWS           | AIA             | Creamy white             | Creamy white                | NP                 | Circular, undulate, umbonate                |
| 44.    | DBR5         | DBWS           | SA              | Creamy white             | Creamy white                | NP                 | Circular, undulate, umbonate                |
| 45.    | DBR6         | DBWS           | SA              | White Brownish           | Brownish                    | NP                 | Irregular, undulate, umbonate               |
| 46.    | DBR7         | DBWS           | AIA             | White Brownish           | Brownish                    | NP                 | Irregular, undulate, umbonate               |
| 47.    | DBR8         | DBWS           | SA              | Dark Brownish            | Brownish                    | NP                 | Circular, undulate, umbonate                |

|     |       |      |     |                |                |          |                               |
|-----|-------|------|-----|----------------|----------------|----------|-------------------------------|
| 48. | DBR9  | DBWS | SA  | Pinkish white  | Pinkish        | NP       | Circular, Rough, Convex,      |
| 49. | DBR10 | DBWS | SA  | Pinkish        | Pinkish        | NP       | Irregular, granulated, raised |
| 50. | DBR11 | DBWS | AIA | Greyish pink   | Pinkish        | NP       | Circular, undulate, raised    |
| 51. | DBR12 | DBWS | AIA | Orange         | Orange         | NP       | Powdery, circular, flat       |
| 52. | DBR13 | DBWS | AIA | Whitish orange | Whitish orange | NP       | Circular, undulate, raised    |
| 53. | DBR14 | DBWS | SA  | White          | Creamy white   | NP       | Rough, Convex, irregular      |
| 54. | DBR15 | DBWS | SA  | White          | Creamy white   | NP       | Circular, undulate, umbonate  |
| 55. | DBR16 | DBWS | SA  | Brown pink     | Brown pink     | NP       | Circular, undulate, umbonate  |
| 56. | DBR17 | DBWS | SA  | Dark brown     | Brownish       | NP       | Circular, convex, umbonate    |
| 57. | DBR18 | DBWS | SA  | Dark brown     | Dark brown     | Brownish | Circular, undulate, umbonate  |
| 58. | DBR19 | DBWS | SA  | White          | Brownish       | Brownish | Circular, lobate, umbonate    |
| 59. | DBR20 | DBWS | SA  | Light brown    | Yellowish      | NP       | Circular, entire, convex,     |
| 60. | DBR21 | DBWS | SA  | Whitish pink   | Dark pink      | NP       | Circular, lobate, umbonate    |
| 61. | DBR22 | DBWS | SA  | Light Orange   | Light Orange   | NP       | Irregular, flat, lobate       |
| 62. | DBR23 | DBWS | AIA | White          | Pink white     | NP       | Circular, undulate, umbonate  |
| 63. | DBR24 | DBWS | AIA | Pinkish        | Pinkish        | NP       | Circular, flat, entire        |
| 64. | DBR25 | DBWS | SA  | Orange         | Orange         | NP       | Circular, lobate, flat        |
| 65. | DBR X | DBWS | AIA | Orange         | Orange         | NP       | Circular, undulate, flat,     |

**PWS:** Pobitora Wildlife Sanctuary; **DBWS:** Deepor Beel Wildlife Sanctuary; **NP:** Not pigmented; **SA:** Streptomyces agar media; **AIA:** Actinomycetes Isolation Agar media.

**Table S3. Presence of biosynthetic genes (PKSII and NRPS) and antimicrobial activity of the representative isolates of actinomycetia**

| Strain name | Inhibition zone (mm)        |                              |                               |                               | Biosynthetic gene |        |
|-------------|-----------------------------|------------------------------|-------------------------------|-------------------------------|-------------------|--------|
|             | MRSA                        | <i>Klebsiella pneumoniae</i> | <i>Pseudomonas aeruginosa</i> | <i>Candida albicans</i>       | NRPS              | PKS-II |
| PBR36       | 24.33 <sup>ab</sup> ± 0.33  | 27.33 <sup>ab</sup> ± 0.33   | 24.67 <sup>ab</sup> ± 0.33    | 26.67 <sup>afgn</sup> ± 0.33  | +                 | +      |
| DBR10       | 24.00 <sup>ab</sup> ± 0.58  | 23.00 <sup>ab</sup> ± 0.58   | 34.33 <sup>a</sup> ± 0.33     | 14.67 <sup>abg</sup> ± 0.33   | ND                | +      |
| DBR11       | 19.67 <sup>ab</sup> ± 0.33  | 21.67 <sup>ab</sup> ± 0.33   | 21.00 <sup>ac</sup> ± 0.58    | 20.33 <sup>afn</sup> ± 0.33   | +                 | +      |
| DBR25       | 21.33 <sup>abc</sup> ± 0.88 | 24.67 <sup>ab</sup> ± 0.33   | 17.00 <sup>abd</sup> ± 0.58   | 26.33 <sup>afn</sup> ± 0.33   | ND                | ND     |
| PBR1        | 30.67 <sup>a</sup> ± 0.33   | 35.00 <sup>a</sup> ± 0.58    | 29.00 <sup>ab</sup> ± 0.58    | 22.33 <sup>afgn</sup> ± 0.33  | +                 | +      |
| PBR11       | 29.00 <sup>a</sup> ± 1.00   | 30.33 <sup>a</sup> ± 0.33    | 21.00 <sup>ab</sup> ± 1.00    | 47.00 <sup>afgn</sup> ± 1.00  | ND                | +      |
| PBR30       | 18.33 <sup>ab</sup> ± 0.33  | 20.33 <sup>ab</sup> ± 0.33   | 18.00 <sup>abd</sup> ± 0.58   | 24.33 <sup>c</sup> ± 0.33     | +                 | +      |
| PBR35       | 19.00 <sup>ab</sup> ± 0.58  | 24.33 <sup>ab</sup> ± 0.33   | 15.00 <sup>abd</sup> ± 0.58   | 18.33 <sup>adg</sup> ± 0.33   | +                 | +      |
| PBR4        | 28.67 <sup>ab</sup> ± 0.88  | 13.67 <sup>b</sup> ± 0.33    | 20.00 <sup>ab</sup> ± 0.58    | 14.33 <sup>acg</sup> ± 0.33   | ND                | +      |
| DBR3        | 14.33 <sup>b</sup> ± 0.33   | NA                           | 10.67 <sup>b</sup> ± 0.33     | 15.00 <sup>afghn</sup> ± 0.58 | ND                | +      |
| DBR17       | NA                          | 21.00 <sup>ab</sup> ± 0.58   | 19.33 <sup>bc</sup> ± 0.33    | 19.67 <sup>afgn</sup> ± 0.33  | ND                | ND     |
| PBR21       | 24.00 <sup>ab</sup> ± 0.58  | NA                           | 22.33 <sup>ab</sup> ± 0.33    | 34.33 <sup>cfl</sup> ± 0.33   | ND                | +      |
| DBRX        | 23.00 <sup>ab</sup> ± 0.58  | NA                           | 20.00 <sup>ab</sup> ± 0.58    | 9.67 <sup>ghmo</sup> ± 0.33   | +                 | +      |
| DBR1        | 10.00 <sup>abc</sup> ± 0.58 | 14.33 <sup>bd</sup> ± 0.33   | 24.33 <sup>ab</sup> ± 0.33    | NA                            | ND                | +      |
| DBR33       | 21.33 <sup>abc</sup> ± 0.88 | NA                           | NA                            | NA                            | ND                | +      |
| PBR19       | 22.33 <sup>ab</sup> ± 0.33  | NA                           | NA                            | NA                            | ND                | +      |
| DBR21       | NA                          | NA                           | 22.67 <sup>ab</sup> ± 0.33    | NA                            | ND                | +      |
| PBR16       | NA                          | NA                           | NA                            | 19.67 <sup>almo</sup> ± 0.33  | ND                | +      |
| DBR5        | NA                          | NA                           | NA                            | 15.33 <sup>bdeno</sup> ± 0.33 | ND                | +      |

Zone of inhibition by well diffusion method. Zone of inhibition values are given as mean ± standard error of mean (n = 3). Values in the same row and sub table not sharing the same superscript are significantly different at p < .001; **NA**- No activity; **ND**- Not detected; +, Detected. **NRPS**; Nonribosomal peptide synthetases, **PKS-II**; Type II polyketide synthases

**Table S4. Antimicrobial activity of actinomycetia isolates by well diffusion method against MDR pathogens.**

| Strain<br>name | Inhibition zone (mm)                 |                                       |                                 |
|----------------|--------------------------------------|---------------------------------------|---------------------------------|
|                | GNR7                                 | GNR18                                 | GNR19                           |
|                | ( <i>Enterococcus<br/>faecalis</i> ) | ( <i>Pseudomonas<br/>aeruginosa</i> ) | ( <i>Escherichia<br/>coli</i> ) |
| PBR36          | 29.67 <sup>a</sup> ± 0.33            | 24.67 <sup>a</sup> ± 0.33             | 24.67 <sup>ac</sup> ± 0.33      |
| DBR10          | 24.33 <sup>ac</sup> ± 0.33           | 16.33 <sup>ah</sup> ± 0.33            | 24.33 <sup>ac</sup> ± 0.33      |
| DBR11          | 30.00 <sup>ac</sup> ± 0.58           | 20.33 <sup>ah</sup> ± 0.33            | 22.33 <sup>ac</sup> ± 0.33      |
| DBR25          | 21.00 <sup>ac</sup> ± 0.58           | 22.00 <sup>ah</sup> ± 0.58            | 21.00 <sup>ac</sup> ± 0.58      |
| PBR1           | 22.00 <sup>ac</sup> ± 0.58           | 27.33 <sup>a</sup> ± 0.33             | 23.67 <sup>ac</sup> ± 0.33      |
| PBR11          | NA                                   | 25.33 <sup>a</sup> ± 0.33             | 29.33 <sup>a</sup> ± 0.33       |
| PBR30          | 20.33 <sup>ac</sup> ± 0.33           | 16.00 <sup>ab</sup> ± 0.58            | 20.67 <sup>ac</sup> ± 0.33      |
| PBR35          | 14.67 <sup>c</sup> ± 0.33            | 20.33 <sup>ah</sup> ± 0.33            | 20.33 <sup>ac</sup> ± 0.33      |
| PBR4           | NA                                   | 14.33 <sup>ah</sup> ± 0.33            | 19.67 <sup>ac</sup> ± 0.33      |
| DBR3           | NA                                   | NA                                    | 22.67 <sup>ac</sup> ± 0.33      |
| DBR17          | 15.00 <sup>abc</sup> ± 0.58          | NA                                    | 23.67 <sup>ac</sup> ± 0.33      |
| PBR21          | NA                                   | 20.67 <sup>ah</sup> ± 0.33            | 24.67 <sup>ac</sup> ± 0.33      |
| DBRX           | NA                                   | NA                                    | 20.33 <sup>ac</sup> ± 0.33      |
| DBR1           | NA                                   | NA                                    | 20.33 <sup>ac</sup> ± 0.33      |
| DBR33          | 21.00 <sup>ac</sup> ± 0.58           | NA                                    | NA                              |
| PBR19          | 20.33 <sup>ac</sup> ± 0.33           | NA                                    | NA                              |
| DBR21          | 21.00 <sup>ac</sup> ± 0.58           | 8.33 <sup>bhi</sup> ± 0.33            | 22.67 <sup>ac</sup> ± 0.33      |
| PBR16          | NA                                   | 14.67 <sup>ai</sup> ± 0.33            | 14.33 <sup>c</sup> ± 0.33       |
| DBR5           | 11.00 <sup>abc</sup> ± 0.58          | NA                                    | NA                              |

(Zone of inhibition by well diffusion method. Zone of inhibition values are given as mean ± standard error of mean (n = 3). Values in the same row and sub table not sharing the same superscript are significantly different at p < .001, **NA**- No activity)

**Table S5. Molecular dentification of antagonistic actinomycetia based on 16S rRNA gene sequences**

| Isolate Name | NCBI-GenBank accession number | Length (bp) | Top-hit taxon name with accession number          | Similarity % | Species identification  |
|--------------|-------------------------------|-------------|---------------------------------------------------|--------------|-------------------------|
| PBR36        | MH922854                      | 1,334       | <i>Streptomyces parvulus</i><br>AB184326          | 100          | <i>Streptomyces</i> sp. |
| DBR10        | MH922850                      | 1,361       | <i>Streptomyces ardesiacus</i><br>DQ026631        | 98.01        | <i>Streptomyces</i> sp. |
| DBR11        | MH922859                      | 1,339       | <i>Streptomyces ardesiacus</i><br>DQ026631        | 99.63        | <i>Streptomyces</i> sp. |
| DBR25        | MH922861                      | 1,339       | <i>Nonomuraea wenchangensis</i><br>FJ261959       | 98.88        | <i>Nonomuraea</i> sp.   |
| PBR1         | MH922852                      | 1,312       | <i>Streptomyces kunmingensis</i><br>AB184597      | 99.08        | <i>Streptomyces</i> sp. |
| PBR30        | MH922863                      | 1,355       | <i>Streptomyces philanthi</i><br>DQ375802         | 98.93        | <i>Streptomyces</i> sp. |
| PBR35        | MN069557                      | 1,389       | <i>Streptomyces parvulus</i><br>AB184326          | 99.93        | <i>Streptomyces</i> sp. |
| PBR4         | MH922849                      | 1,341       | <i>Streptomyces kebangsaanensis</i><br>HM449824   | 98.95        | <i>Streptomyces</i> sp. |
| DBR3         | MH922864                      | 1,345       | <i>Streptomyces kebangsaanensis</i><br>HM449824   | 98.81        | <i>Streptomyces</i> sp. |
| PBR21        | MH922856                      | 1,210       | <i>Streptomyces racemochromogenes</i><br>DQ026656 | 99.17        | <i>Streptomyces</i> sp. |
| DBR17        | MH922855                      | 1,346       | <i>Actinomadura nitritigenes</i><br>AY035999      | 99.26        | <i>Actinomadura</i> sp. |
| DBR1         | MH922858                      | 1,310       | <i>Streptomyces parvulus</i><br>AB184326          | 99.85        | <i>Streptomyces</i> sp. |
| DBR33        | MH922857                      | 1,330       | <i>Streptomyces deserti</i><br>HE577172           | 98.79        | <i>Streptomyces</i> sp. |
| PBR19        | MH922862                      | 1,348       | <i>Streptomyces atrovirens</i><br>DQ026672        | 93.96        | <i>Streptomyces</i> sp. |
| DBRX         | MH922853                      | 1,303       | <i>Nocardia nova</i><br>BDBN01000167              | 99.92        | <i>Nocardia</i> sp.     |
| PBR11        | MH718314                      | 1,370       | <i>Streptomyces atrovirens</i><br>DQ026672        | 92.91        | <i>Streptomyces</i> sp. |
| DBR5         | MH922860                      | 1,343       | <i>Streptomyces parvulus</i><br>AB184326          | 99.25        | <i>Streptomyces</i> sp. |
| DBR21        | MK981152                      | 1,364       | <i>Streptomyces rubrogriseus</i><br>AJ781373      | 99.63        | <i>Streptomyces</i> sp. |
| DBR16        | MH922851                      | 1,371       | <i>Streptomyces ardesiacus</i><br>DQ026631        | 99.64        | <i>Streptomyces</i> sp. |

**Table S6. WGS assembly statistics, quality report and taxonomic identification of *Streptomyces* sp. DBR11, *Streptomyces* sp. PBR1 and *Streptomyces* sp. PBR36**

| Features                     |                | Strain name                       |                                     |                                  |
|------------------------------|----------------|-----------------------------------|-------------------------------------|----------------------------------|
|                              |                | <i>Streptomyces</i> sp.<br>DBR11  | <i>Streptomyces</i> sp.<br>PBR1     | <i>Streptomyces</i> sp.<br>PBR36 |
| ANI Taxonomic identification |                | <i>Streptomyces coelicoflavus</i> | <i>Streptomyces longispororuber</i> | <i>Streptomyces parvulus</i>     |
| BioSample                    |                | SAMN28084415                      | SAMN28084416                        | SAMN28084415                     |
| BioProject number            |                | PRJNA834923                       | PRJNA834923                         | PRJNA834923                      |
| SRA                          |                | SRX15248015                       | SRX15248016                         | SRX15248017                      |
| Scaffolds                    |                | 378                               | 448                                 | 359                              |
| Total length                 |                | 8076063                           | 9557226                             | 7334189                          |
| Gaps                         |                | 0                                 | 0                                   | 0                                |
| N50 [Kb]                     |                | 39                                | 38                                  | 34                               |
| GC [%]                       |                | 72.09                             | 71.75                               | 72.82                            |
| No. of protein-coding genes  |                | 7218                              | 9018                                | 6250                             |
| CRISPR                       |                | 1                                 | 2                                   | -                                |
| rRNA                         |                | 3                                 | 3                                   | 3                                |
| tRNA                         |                | 75                                | 87                                  | 76                               |
| tmRNA                        |                | 1                                 | 1                                   | 1                                |
| BGC                          |                | 31                                | 33                                  | 29                               |
| BUSCO Analysis               | Complete [%]   | 98.4                              | 97.7                                | 98.7                             |
|                              | Fragmented [%] | 0.8                               | 0.4                                 | 0.6                              |
|                              | Missing [%]    | 0.8                               | 1.9                                 | 0.7                              |
